# Supplementary material
Source: MDPI journal article supplement (https://www.mdpi.com/2077-1312/10/12/1877)
Supplement: s1 [file s1]

# Forensic Analysis of Residual Oil Along Abu Ali Island, Saudi Arabia

Jacqueline Michel <sup>1,\*</sup>, Zachary Nixon <sup>1</sup>, Linos Cotsapas <sup>1</sup>, Scott Zengel <sup>2</sup>, Jennifer Weaver <sup>1</sup>, Harold Fravel <sup>2</sup> and Philip Bambach <sup>1</sup>

<sup>1</sup> Research Planning, Inc., Columbia, SC 29201, USA

<sup>2</sup> Research Planning, Inc., Tallahassee, FL 32303, USA

\* Correspondence: jmichel@researchplanning.com

Table S1. The biomarker compounds and diagnostic ratios used in the fingerprinting analysis of the sediment samples collected from Abu Ali Island in 2020.

| Abbreviation | Compound Name                                                         | Diagnostic Ratio |
|--------------|-----------------------------------------------------------------------|------------------|
| Ts           | 18a-22,29,30-Trisnorneohopane                                         | Ts/Tm            |
| Tm           | 17a(H)-22,29,30-Trisnorhopane                                         | Ts/Hop           |
| Hop          | Hopane                                                                | Tm/Hop           |
| BNH          | 17a/b,21b/a 28,30-Bisnorhopane                                        | H29/Hop          |
| H29          | 30-Norhopane                                                          | BNH/Hop          |
| H31S         | 30-Homohopane-22S                                                     | OL/Hop           |
| Gam          | T22a-Gammacerane/C32-diahopane                                        | H31S/Hop         |
| 27dia R      | 13b(H),17a(H)-20R-Diacholestane                                       | Gam/Hop          |
| S            | 13b(H),17a(H)-20S-Diacholestane                                       | 27dia R/S        |
| 27bb         | 14b(H),17b(H)-20R-Cholestane + 14b(H),17b(H)-20S-Cholestane           | 27bb/29bb        |
| 29bb         | 14b(H),17b(H)-20R-Ethylcholestane + 14b(H),17b(H)-20S-Ethylcholestane | 26S/26R+27S      |
| 26S          | C26,20S TAS                                                           | 28S/26R+27S      |
| 26R+27S      | C26,20R+C27,20S TAS                                                   | 27R/26R+27S      |
| 28S          | C28,20S TAS                                                           | 28R/26R+27S      |
| 27R          | C27,20R TAS                                                           | 29aaS/29aaR      |
| 28R          | C28,20R TAS                                                           |                  |
| 29aaS        | 14a(H),17a(H)-20S-Ethylcholestane                                     |                  |
| 29aaR        | 14a(H),17a(H)-20R-Ethylcholestane                                     |                  |

Table S2. Diagnostic ratios of biomarkers for 2020 Abu Ali Island samples. Those ratios that are very different from the mean and standard deviation are highlighted in pink; those that are outside the mean and standard deviation are highlighted in yellow.

| Sample ID        | Ts/Tm | Ts/Hop | Tm/Hop | H29/Hop | BNH/Hop | OL/Hop | H31s/Hop | Gam/Hop | 27dia R/S | 27bb/29bb | 26S/26R+27S | 28S/26R+27S | 27R/26R+27S | 28R/26R+27S | 29aaS/29aaR |
|------------------|-------|--------|--------|---------|---------|--------|----------|---------|-----------|-----------|-------------|-------------|-------------|-------------|-------------|
| 1-3 (0-19 cm)    | 0.22  | 0.07   | 0.33   | 1.13    | 0.01    | 0.10   | 0.45     | 0.04    | 0.58      | 1.43      | 0.19        | 0.73        | 0.73        | 0.77        | 1.07        |
| 2-2 (10-20 cm)   |       |        | 0.30   | 1.20    |         |        | 0.46     |         |           |           |             | 1.00        |             | 1.00        |             |
| 6-1 (1-15 cm)    | 0.29  | 0.10   | 0.34   | 1.25    | 0.01    | 0.11   | 0.43     | 0.02    | 0.43      | 1.16      | 0.19        | 0.80        | 0.73        | 0.87        | 1.00        |
| 7-1              | 0.28  | 0.10   | 0.35   | 1.25    | 0.01    | 0.12   | 0.47     | 0.03    | 0.49      | 1.36      | 0.18        | 0.81        | 0.77        | 0.88        | 1.11        |
| 11-3 (2-36 cm)   | 0.21  | 0.07   | 0.32   | 1.15    | 0.01    | 0.10   | 0.45     | 0.04    | 0.52      | 1.42      | 0.19        | 0.74        | 0.74        | 0.79        | 1.08        |
| 15-4             | 0.21  | 0.07   | 0.33   | 1.13    | 0.01    | 0.10   | 0.45     | 0.04    | 0.55      | 1.40      | 0.19        | 0.74        | 0.70        | 0.78        | 1.03        |
| 16-4 (0-5 cm)    | 0.23  | 0.08   | 0.35   | 1.27    | 0.01    | 0.11   | 0.46     | 0.04    | 0.49      | 1.51      | 0.19        | 0.77        | 0.73        | 0.82        | 1.24        |
| 22-5             | 0.23  | 0.08   | 0.33   | 1.19    | 0.01    | 0.11   | 0.46     | 0.04    | 0.50      | 1.40      | 0.19        | 0.75        | 0.71        | 0.79        | 1.17        |
| 24-4             | 0.25  | 0.09   | 0.34   | 1.27    | 0.01    | 0.11   | 0.47     | 0.03    | 0.50      | 1.33      | 0.19        | 0.76        | 0.71        | 0.81        | 1.11        |
| 26-5             | 0.22  | 0.07   | 0.33   | 1.22    | 0.01    | 0.11   | 0.46     | 0.04    | 0.55      | 1.38      | 0.19        | 0.77        | 0.69        | 0.81        | 1.09        |
| 28-3             | 0.26  | 0.08   | 0.32   | 1.19    | 0.01    | 0.10   | 0.45     | 0.04    | 0.55      | 1.33      | 0.19        | 0.77        | 0.69        | 0.86        | 1.11        |
| 30-3 (10-22 cm)  | 0.21  | 0.07   | 0.33   | 1.19    | 0.01    | 0.10   | 0.46     | 0.04    | 0.50      | 1.43      | 0.20        | 0.75        | 0.71        | 0.83        | 1.06        |
| 30-5 (0-20 cm)   | 0.20  | 0.06   | 0.32   | 1.18    | 0.01    | 0.10   | 0.45     | 0.04    | 0.55      | 1.37      | 0.19        | 0.72        | 0.72        | 0.80        | 1.20        |
| 32-4 (0-15 cm)   | 0.21  | 0.07   | 0.34   | 1.23    | 0.01    | 0.10   | 0.47     | 0.05    | 0.51      | 1.40      | 0.19        | 0.75        | 0.70        | 0.80        | 1.16        |
| 39-3 (2-20 cm)   | 0.22  | 0.07   | 0.33   | 1.20    | 0.01    | 0.10   | 0.46     | 0.04    | 0.54      | 1.33      | 0.19        | 0.73        | 0.73        | 0.82        | 1.10        |
| 40-4 (9-13 cm)   | 0.24  | 0.08   | 0.33   | 1.17    | 0.01    | 0.11   | 0.46     | 0.04    | 0.51      | 1.28      | 0.20        | 0.78        | 0.74        | 0.83        | 1.00        |
| 45-3 (36-48 cm)  | 0.23  | 0.07   | 0.32   | 1.18    | 0.01    | 0.10   | 0.44     | 0.04    | 0.52      | 1.34      | 0.19        | 0.71        | 0.71        | 0.86        | 1.00        |
| 49-3 (0-5 cm)    | 0.22  | 0.07   | 0.32   | 1.13    | 0.01    | 0.10   | 0.44     | 0.04    | 0.56      | 1.22      | 0.19        | 0.73        | 0.71        | 0.80        | 0.95        |
| 52-2 (0-12 cm)   | 0.28  | 0.09   | 0.33   | 1.23    | 0.01    | 0.11   | 0.47     | 0.02    | 0.45      | 1.15      | 0.19        | 0.79        | 0.74        | 0.85        | 1.08        |
| 55-3 (12-36 cm)  | 0.22  | 0.07   | 0.33   | 1.18    | 0.01    | 0.10   | 0.45     | 0.04    | 0.53      | 1.32      | 0.19        | 0.74        | 0.71        | 0.79        | 1.19        |
| 55-4             | 0.22  | 0.07   | 0.33   | 1.16    | 0.01    | 0.10   | 0.44     | 0.04    | 0.50      | 1.44      | 0.19        | 0.74        | 0.69        | 0.79        | 1.16        |
| 56-5 (1-27 cm)   | 0.23  | 0.08   | 0.34   | 1.18    | 0.01    | 0.10   | 0.43     | 0.04    | 0.53      | 1.28      | 0.19        | 0.73        | 0.68        | 0.75        | 1.12        |
| 59-4 (0-15 cm)   | 0.22  | 0.07   | 0.33   | 1.17    | 0.01    | 0.10   | 0.43     | 0.04    | 0.53      | 1.42      | 0.19        | 0.74        | 0.71        | 0.80        | 1.15        |
| 60-4 (7-14 cm)   | 0.25  | 0.08   | 0.32   | 1.21    | 0.01    | 0.10   | 0.41     | 0.03    | 0.48      | 1.19      | 0.18        | 0.74        | 0.72        | 0.79        | 1.16        |
| 61-1             | 0.28  | 0.10   | 0.35   | 1.23    | 0.02    | 0.13   | 0.46     | 0.04    | 0.47      | 1.39      | 0.18        | 0.78        | 0.73        | 0.86        | 1.16        |
| 70-1 (10-15 cm)  |       |        | 0.28   | 1.14    |         |        | 0.43     |         |           |           |             |             |             |             |             |
| 95-2             | 0.27  | 0.09   | 0.33   | 1.20    | 0.01    | 0.10   | 0.46     | 0.03    | 0.54      | 1.20      | 0.18        | 0.77        | 0.70        | 0.85        | 1.00        |
| 98-4             | 0.23  | 0.08   | 0.33   | 1.14    | 0.01    | 0.10   | 0.46     | 0.05    | 0.54      | 1.33      | 0.19        | 0.76        | 0.73        | 0.82        | 1.00        |
| 98-5             | 0.22  | 0.07   | 0.33   | 1.19    | 0.01    | 0.10   | 0.46     | 0.04    | 0.53      | 1.46      | 0.19        | 0.74        | 0.72        | 0.79        | 1.08        |
| 99-4             | 0.30  | 0.11   | 0.36   | 1.29    | 0.02    | 0.13   | 0.47     | 0.02    | 0.44      | 1.10      | 0.19        | 0.82        | 0.73        | 0.86        | 0.89        |
| 102-2 (68-76 cm) | 0.22  | 0.07   | 0.32   | 1.14    | 0.01    | 0.10   | 0.45     | 0.04    | 0.53      | 1.35      | 0.19        | 0.75        | 0.73        | 0.80        | 1.13        |
| 103-4 (5-35 cm)  | 0.21  | 0.07   | 0.33   | 1.19    | 0.01    | 0.10   | 0.46     | 0.05    | 0.51      | 1.46      | 0.19        | 0.74        | 0.71        | 0.79        | 1.30        |
| 104-5 (20-38 cm) | 0.22  | 0.07   | 0.33   | 1.15    | 0.01    | 0.10   | 0.45     | 0.04    | 0.55      | 1.35      | 0.19        | 0.75        | 0.71        | 0.79        | 1.07        |
| 106-2 (52-70 cm) | 0.22  | 0.08   | 0.34   | 1.13    | 0.01    | 0.11   | 0.46     | 0.04    | 0.50      | 1.41      | 0.19        | 0.76        | 0.72        | 0.80        | 1.13        |
| 106-3 (12-44 cm) | 0.23  | 0.08   | 0.34   | 1.14    | 0.02    | 0.11   | 0.47     | 0.05    | 0.53      | 1.37      | 0.19        | 0.70        | 0.70        | 0.78        | 1.11        |
| 108-1 (22-42 cm) | 0.23  | 0.07   | 0.32   | 1.13    | 0.01    | 0.09   | 0.44     | 0.04    | 0.50      | 1.42      | 0.19        | 0.73        | 0.73        | 0.82        | 1.10        |
| 109-3 (0-25 cm)  | 0.22  | 0.08   | 0.35   | 1.23    | 0.01    | 0.11   | 0.45     | 0.05    | 0.53      | 1.49      | 0.19        | 0.76        | 0.67        | 0.81        | 1.08        |
| 116-4 (10-24 cm) | 0.26  | 0.09   | 0.36   | 1.29    | 0.02    | 0.12   | 0.46     | 0.05    | 0.51      | 1.99      | 0.20        | 0.73        | 0.73        | 0.80        | 1.29        |
| 117-4 (0-30cm)   | 0.22  | 0.07   | 0.32   | 1.15    | 0.01    | 0.10   | 0.42     | 0.04    | 0.53      | 1.44      | 0.19        | 0.74        | 0.74        | 0.79        | 1.13        |
| 122-6 (0-4 cm)   | 0.24  | 0.09   | 0.39   | 1.38    | 0.01    | 0.13   | 0.48     | 0.06    | 0.54      | 3.68      | 0.20        | 0.73        | 0.73        | 0.79        | 2.00        |
| 123-4 (30-45 cm) | 0.23  | 0.09   | 0.37   | 1.36    | 0.02    | 0.13   | 0.46     | 0.06    | 0.48      | 1.49      | 0.19        | 0.74        | 0.70        | 0.78        | 1.21        |
| 126-1 (20-38 cm) | 0.23  | 0.07   | 0.33   | 1.15    | 0.01    | 0.10   | 0.44     | 0.04    | 0.53      | 1.41      | 0.19        | 0.75        | 0.70        | 0.80        | 1.17        |
| 127-4 (0-14 cm)  | 0.24  | 0.08   | 0.33   | 1.21    | 0.01    | 0.10   | 0.46     | 0.05    | 0.52      | 1.69      | 0.20        | 0.75        | 0.70        | 0.80        | 1.23        |
| 128-4 (30-56 cm) | 0.22  | 0.07   | 0.33   | 1.16    | 0.01    | 0.10   | 0.46     | 0.04    | 0.55      | 1.42      | 0.19        | 0.76        | 0.71        | 0.82        | 1.03        |
| 130-3            | 0.23  | 0.08   | 0.33   | 1.15    | 0.01    | 0.10   | 0.46     | 0.04    | 0.53      | 1.25      | 0.19        | 0.74        | 0.74        | 0.79        | 1.04        |
| 132-2            | 0.21  | 0.07   | 0.33   | 1.18    | 0.01    | 0.10   | 0.46     | 0.04    | 0.52      | 1.40      | 0.19        | 0.76        | 0.72        | 0.80        | 1.08        |
| 134-4 (5-25 cm)  | 0.22  | 0.07   | 0.32   | 1.17    | 0.01    | 0.10   | 0.46     | 0.05    | 0.55      | 1.38      | 0.20        | 0.74        | 0.71        | 0.80        | 1.10        |
| 135-3            | 0.21  | 0.07   | 0.33   | 1.17    | 0.01    | 0.10   | 0.43     | 0.04    | 0.55      | 1.41      | 0.19        | 0.76        | 0.71        | 0.79        | 1.13        |
| 137-2 (22-29 cm) | 0.24  | 0.08   | 0.33   | 1.20    | 0.01    | 0.10   | 0.45     | 0.04    | 0.50      | 1.43      | 0.19        | 0.74        | 0.70        | 0.82        | 1.04        |
| 139-4            | 0.31  | 0.24   | 0.77   | 3.14    | 0.04    | 0.41   | 0.68     | 0.13    | 0.35      | 5.62      | 0.20        | 0.75        | 0.74        | 0.79        | 1.77        |
| 142-3            | 0.27  | 0.14   | 0.53   | 1.83    | 0.01    | 0.18   | 0.50     | 0.08    | 0.56      | 16.07     | 0.20        | 0.72        | 0.72        | 0.78        | 2.13        |

| Sample ID          | Ts/Tm | Ts/Hop | Tm/Hop | H29/Hop | BNH/Hop | OL/Hop | H31s/Hop | Gam/Hop | 27dia R/S | 27bb/29bb | 26S/26R+27S | 28S/26R+27S | 27R/26R+27S | 28R/26R+27S | 29aaS/29aaR |
|--------------------|-------|--------|--------|---------|---------|--------|----------|---------|-----------|-----------|-------------|-------------|-------------|-------------|-------------|
| 144-4              | 0.23  | 0.08   | 0.33   | 1.16    | 0.01    | 0.10   | 0.44     | 0.04    | 0.52      | 1.20      | 0.18        | 0.78        | 0.73        | 0.84        | 1.00        |
| 145-4              | 0.26  | 0.09   | 0.36   | 1.25    |         | 0.10   | 0.43     | 0.02    |           | 0.74      |             | 1.13        | 0.60        | 1.19        | 0.92        |
| 147-4              | 0.22  | 0.09   | 0.42   | 1.45    | 0.01    | 0.13   | 0.45     | 0.05    | 0.51      | 1.76      | 0.20        | 0.72        | 0.72        | 0.77        | 1.35        |
| 149-4              | 0.22  | 0.07   | 0.33   | 1.17    | 0.01    | 0.10   | 0.46     | 0.04    | 0.52      | 1.44      | 0.19        | 0.72        | 0.72        | 0.78        | 1.14        |
| 151-7              | 0.22  | 0.07   | 0.32   | 1.17    | 0.01    | 0.10   | 0.45     | 0.04    | 0.53      | 1.38      | 0.19        | 0.76        | 0.71        | 0.80        | 1.03        |
| 153-3              | 0.22  | 0.09   | 0.44   | 1.56    | 0.01    | 0.14   | 0.47     | 0.06    | 0.50      | 8.13      | 0.19        | 0.73        | 0.70        | 0.76        | 3.52        |
| 155-4              | 0.25  | 0.09   | 0.36   | 1.29    |         | 0.11   | 0.44     | 0.04    | 0.52      | 2.43      | 0.18        | 0.75        | 0.71        | 0.82        | 2.78        |
| 157-4              | 0.23  | 0.08   | 0.34   | 1.17    | 0.01    | 0.10   | 0.43     | 0.03    | 0.49      | 1.06      | 0.13        | 0.92        | 0.68        | 1.00        | 1.06        |
| 159-2              | 0.25  | 0.08   | 0.33   | 1.17    | 0.01    | 0.11   | 0.48     | 0.04    | 0.54      | 1.15      | 0.18        | 0.80        | 0.69        | 0.85        | 0.93        |
| 163-5              | 0.24  | 0.08   | 0.34   | 1.19    | 0.01    | 0.11   | 0.47     | 0.03    | 0.54      | 1.32      | 0.19        | 0.76        | 0.73        | 0.80        | 1.10        |
| 167-4              | 0.23  | 0.08   | 0.32   | 1.20    |         | 0.10   | 0.43     | 0.03    | 0.51      | 1.32      |             | 0.80        | 0.73        | 0.89        | 0.88        |
| 171-5              | 0.28  | 0.09   | 0.34   | 1.18    | 0.01    | 0.11   | 0.46     | 0.03    | 0.51      | 1.20      | 0.18        | 0.77        | 0.73        | 0.88        | 0.87        |
| 175-6 (5-25cm)     | 0.22  | 0.07   | 0.33   | 1.19    | 0.01    | 0.10   | 0.46     | 0.04    | 0.51      | 1.48      | 0.19        | 0.74        | 0.69        | 0.79        | 1.04        |
| 176-3 (2-22 cm)    | 0.24  | 0.08   | 0.34   | 1.21    | 0.01    | 0.10   | 0.45     | 0.04    | 0.53      | 1.40      | 0.19        | 0.77        | 0.72        | 0.79        | 1.21        |
| 178-3 (10-20 cm)   |       |        | 0.30   | 1.19    |         |        | 0.43     |         |           |           |             |             |             |             |             |
| 182-3              | 0.21  | 0.07   | 0.32   | 1.17    | 0.01    | 0.10   | 0.45     | 0.04    | 0.53      | 1.31      | 0.19        | 0.74        | 0.72        | 0.79        | 1.07        |
| 183-5 (0-14 cm)    | 0.22  | 0.07   | 0.33   | 1.16    | 0.01    | 0.10   | 0.47     | 0.04    | 0.50      | 1.25      | 0.19        | 0.75        | 0.73        | 0.81        | 1.14        |
| 185-6              | 0.25  | 0.08   | 0.33   | 1.21    | 0.01    | 0.11   | 0.45     | 0.03    | 0.49      | 1.24      | 0.19        | 0.79        | 0.71        | 0.83        | 0.95        |
| 193-2 (0-20 cm)    | 0.22  | 0.07   | 0.33   | 1.14    |         | 0.10   | 0.43     | 0.04    | 0.52      | 1.34      | 0.19        | 0.74        | 0.71        | 0.77        | 1.21        |
| 193-4              | 0.23  | 0.07   | 0.32   | 1.19    | 0.01    | 0.10   | 0.45     | 0.04    | 0.51      | 1.35      | 0.19        | 0.77        | 0.72        | 0.81        | 1.07        |
| 193-8 (30-50 cm)   | 0.22  | 0.07   | 0.32   | 1.13    | 0.01    | 0.10   | 0.43     | 0.04    | 0.53      | 1.40      | 0.19        | 0.76        | 0.73        | 0.79        | 1.16        |
| 197-2 (0-11 cm)    | 0.21  | 0.07   | 0.33   | 1.17    | 0.01    | 0.10   | 0.45     | 0.04    | 0.51      | 1.38      | 0.19        | 0.75        | 0.70        | 0.80        | 1.18        |
| 201-1 (10-15 cm)   |       |        | 0.28   | 1.15    |         | 0.10   | 0.42     |         |           | 1.22      |             | 0.93        | 0.71        | 1.07        | 1.17        |
| 202-2 (30-70 cm)   |       |        |        |         |         |        |          |         |           |           |             |             |             |             |             |
| 205-7 (10-20 cm)   | 0.28  | 0.09   | 0.33   | 1.21    | 0.01    | 0.11   | 0.45     | 0.02    | 0.48      | 1.18      | 0.19        | 0.77        | 0.71        | 0.86        | 1.15        |
| 208-4              | 0.29  | 0.10   | 0.34   | 1.22    | 0.01    | 0.11   | 0.44     | 0.02    | 0.42      | 0.99      | 0.19        | 0.78        | 0.73        | 0.86        | 0.98        |
| 209-2 (11-30 cm)   | 0.23  | 0.07   | 0.33   | 1.15    | 0.01    | 0.10   | 0.44     | 0.04    | 0.53      | 1.41      | 0.19        | 0.73        | 0.71        | 0.78        | 1.17        |
| 209-6 (60-74 cm)   | 0.23  | 0.07   | 0.32   | 1.15    | 0.01    | 0.10   | 0.44     | 0.04    | 0.54      | 1.27      | 0.18        | 0.79        | 0.69        | 0.85        | 0.96        |
| 210-4 (10-30 cm)   | 0.21  | 0.07   | 0.33   | 1.19    | 0.01    | 0.10   | 0.44     | 0.04    | 0.50      | 1.40      | 0.19        | 0.75        | 0.70        | 0.80        | 1.08        |
| 213-7 (52-60 cm)   | 0.21  | 0.07   | 0.32   | 1.17    | 0.01    | 0.09   | 0.43     | 0.04    | 0.59      | 1.33      | 0.19        | 0.76        | 0.71        | 0.82        | 1.14        |
| 216-4              | 0.20  | 0.07   | 0.33   | 1.15    | 0.01    | 0.10   | 0.45     | 0.04    | 0.53      | 1.41      | 0.19        | 0.75        | 0.73        | 0.81        | 1.22        |
| 218-2 (30-48 cm)   | 0.21  | 0.07   | 0.33   | 1.19    | 0.01    | 0.10   | 0.46     | 0.04    | 0.53      | 1.54      | 0.19        | 0.74        | 0.71        | 0.81        | 1.12        |
| 220-3              | 0.23  | 0.07   | 0.32   | 1.16    | 0.01    | 0.10   | 0.44     | 0.04    | 0.49      | 1.42      | 0.18        | 0.70        | 0.70        | 0.78        | 1.06        |
| 221-2 (15-30 cm)   | 0.21  | 0.07   | 0.33   | 1.20    | 0.01    | 0.11   | 0.47     | 0.04    | 0.54      | 1.41      | 0.18        | 0.78        | 0.73        | 0.84        | 1.05        |
| 222-2 (0-10 cm)    |       |        | 0.33   | 1.31    |         | 0.12   | 0.44     |         |           |           |             | 0.98        |             | 1.04        | 1.13        |
| 225-2 (12-18 cm)   | 0.23  | 0.08   | 0.34   | 1.17    | 0.01    | 0.11   | 0.47     | 0.04    | 0.52      | 1.34      | 0.19        | 0.79        | 0.71        | 0.79        | 1.14        |
| 227-3 (12-24 cm)   | 0.23  | 0.08   | 0.35   | 1.18    | 0.01    | 0.11   | 0.47     | 0.04    | 0.53      | 1.39      | 0.19        | 0.74        | 0.70        | 0.77        | 1.12        |
| 229-4              | 0.26  | 0.09   | 0.33   | 1.21    | 0.01    | 0.11   | 0.46     | 0.04    | 0.50      | 1.27      | 0.19        | 0.75        | 0.75        | 0.81        | 1.06        |
| 231-2 (14-28 cm)   | 0.20  | 0.07   | 0.34   | 1.19    | 0.02    | 0.10   | 0.46     | 0.05    | 0.54      | 1.37      | 0.19        | 0.75        | 0.73        | 0.83        | 1.05        |
| 233-4              | 0.29  | 0.10   | 0.34   | 1.24    | 0.02    | 0.11   | 0.44     | 0.02    | 0.41      | 1.15      | 0.19        | 0.77        | 0.72        | 0.87        | 1.26        |
| 238-5              | 0.25  | 0.09   | 0.34   | 1.19    | 0.01    | 0.11   | 0.47     | 0.04    | 0.50      | 1.37      | 0.20        | 0.73        | 0.70        | 0.83        | 1.07        |
| 239-3 (8-16 cm)    | 0.23  | 0.08   | 0.35   | 1.23    | 0.01    | 0.11   | 0.45     | 0.05    | 0.52      | 1.71      | 0.20        | 0.72        | 0.72        | 0.81        | 1.41        |
| 240-3              | 0.22  | 0.07   | 0.33   | 1.15    | 0.01    | 0.10   | 0.45     | 0.04    | 0.52      | 1.39      | 0.19        | 0.76        | 0.69        | 0.79        | 1.13        |
| 243-3              | 0.24  | 0.08   | 0.32   | 1.18    | 0.01    | 0.11   | 0.47     | 0.05    | 0.52      | 1.36      | 0.19        | 0.74        | 0.72        | 0.79        | 1.07        |
| 246-3 (2-15 cm)    | 0.23  | 0.07   | 0.33   | 1.16    | 0.01    | 0.10   | 0.45     | 0.04    | 0.52      | 1.45      | 0.19        | 0.75        | 0.71        | 0.79        | 1.14        |
| 248-5              | 0.26  | 0.09   | 0.36   | 1.25    | 0.01    | 0.12   | 0.44     | 0.03    | 0.44      | 2.15      | 0.13        | 0.84        | 0.68        | 0.89        | 1.30        |
| 249-4              | 0.22  | 0.07   | 0.33   | 1.17    | 0.01    | 0.10   | 0.46     | 0.04    | 0.53      | 1.20      | 0.19        | 0.75        | 0.71        | 0.81        | 1.08        |
| 252-4              | 0.23  | 0.08   | 0.35   | 1.23    | 0.01    | 0.11   | 0.47     | 0.05    | 0.54      | 1.35      | 0.19        | 0.73        | 0.73        | 0.80        | 1.06        |
| 253-4              | 0.22  | 0.08   | 0.35   | 1.23    | 0.01    | 0.11   | 0.45     | 0.05    | 0.52      | 1.58      | 0.19        | 0.74        | 0.71        | 0.79        | 1.17        |
| Average            | 0.23  | 0.08   | 0.34   | 1.22    | 0.01    | 0.11   | 0.45     | 0.04    | 0.51      | 1.40      | 0.19        | 0.77        | 0.71        | 0.82        | 1.17        |
| Standard Deviation | 0.02  | 0.02   | 0.05   | 0.21    | 0.00    | 0.03   | 0.03     | 0.01    | 0.04      | 0.32      | 0.01        | 0.06        | 0.02        | 0.06        | 0.35        |
